# Supplementary material
Source: publisher figshare collection journal article supplement (https://gsajournals.figshare.com/ndownloader/files/24159227)
Supplement: Supplementary file 1 [file 24159227]

## Sheet: Supplementary Table S4
Supplementary Table S4. Significant markers identified in the validation sets. Markers were all significant at α = 0.05 after a Benjaminini-Hochberg false discovery rate corection. Average additive effects of each marker are displayed for environments where the markers were significant. A 736 bp region of chomosome 1 that is significantly associated in three environments is highlighted.
KASP Marker Name	Assembly Identified in	R. occidentalis Chromosome	Position	Diagnostic Allele	USDA-ARS HCRU 2015	USDA-ARS HCRU 2016	UA 2015	UA 2016
BBS_SNP47_1	Rubus occidentalis V3	Ro01	2030370	A	-1.39029	-2.23129
BBS_SNP10_1	Hillquist V1	Ro01	2030370	T	-1.18337	-2.09683
BBS_INDL36_1	Rubus occidentalis V3	Ro01	2030493	ATGAAATAG		-1.36125
BBS_SNP9	Hillquist V1	Ro01	2030503	C	-1.19363	-2.14363
BBS_SNP49	Rubus occidentalis V3	Ro01	2030690	C		-1.18273
BBS_SNP50	Rubus occidentalis V3	Ro01	2030709	A		-1.35292
BBS_SNP8_2	Hillquist V1	Ro01	2030948	G		-2.08529
BBS_INDL37_1	Rubus occidentalis V3	Ro01	2031065	TG		-1.37689
BBS_INDL38_1	Rubus occidentalis V3	Ro01	2031103	GAA		-1.33325
BBS_SNP56	Rubus occidentalis V3	Ro01	2031234	G		-1.46661
BBS_SNP57	Rubus occidentalis V3	Ro01	2031363	C	-1.17736	-2.11011
BBS_SNP8_1	Hillquist V1	Ro01	2031363	G	-1.22235	-2.14994
BBS_SNP7	Hillquist V1	Ro01	2031527	A	-1.14529	-2.04692
BBS_SNP63	Rubus occidentalis V3	Ro01	4273414	T		1.45769
BBS_INDL25	Hillquist V1	Ro01	4273457	GTAAC	-1.66127	-2.66286
BBS_SNP41	Rubus occidentalis V3	Ro01	12140344	G		-1.95505
BBS_SNP28	Hillquist V1	Ro01	12140344	C	-1.49004	-2.3622
BBS_INDL30_1	Rubus occidentalis V3	Ro01	14978179	GGTATATATC		1.18056		1.23918
BBS_SNP43	Rubus occidentalis V3	Ro01	14978452	G		1.61894		1.26244
BBS_SNP45	Rubus occidentalis V3	Ro01	14978562	T	1.12071	1.73571		1.35336
BBS_INDL31	Rubus occidentalis V3	Ro01	14978613	GT	1.36541	1.9188		1.31511
BBS_SNP46	Rubus occidentalis V3	Ro01	14979298	A	1.21818	1.81972		1.27693
BBS_INDL41	Rubus occidentalis V3	Ro02	6317435	CAAACT		1.39529
BBS_INDL9	Hillquist V1	Ro02	6317557	TAGAAGT		1.51981
BBS_INDL62	Rubus occidentalis V3	Ro04	617728	GCTTTGCC			3.09365
BBS_INDL1	Hillquist V1	Ro04	618899	TAC	1.51618	2.04198
BBS_INDL4_2	Hillquist V1	Ro04	2720594	GGAAATGGAAATAGA	-1.12346	-1.64641
BBS_INDL3	Hillquist V1	Ro04	2720597	AGA	-1.24491	-1.59566
BBS_INDL27	Hillquist V1	Ro04	4199385	ATGA	1.21836	1.80753
BBS_SNP23	Hillquist V1	Ro04	8803059	C		1.72287
BBS_SNP88	Rubus occidentalis V3	Ro04	8803219	G		1.65492
BBS_SNP24	Hillquist V1	Ro04	8803219	G		1.73447
BBS_SNP29	Hillquist V1	Ro04	11167778	G	-1.2807	-2.73501
BBS_SNP72	Rubus occidentalis V3	Ro04	11167966	A		-1.785
BBS_SNP30	Hillquist V1	Ro04	11167966	A		-1.99373
BBS_SNP73	Rubus occidentalis V3	Ro04	11168332	A		-2.00861
BBS_SNP31	Hillquist V1	Ro04	11168332	A		-1.785
BBS_SNP74	Rubus occidentalis V3	Ro04	11168430	C		-1.785
BBS_SNP32	Hillquist V1	Ro04	11168430	C		-1.882
BBS_INDL20_1	Hillquist V1	Ro04	11168553	GCCTTCA		-1.16805
BBS_INDL22_1	Hillquist V1	Ro04	11168739	GGAG		-1.83778
BBS_SNP35	Hillquist V1	Ro04	11168758	T		-1.60585
BBS_SNP11	Hillquist V1	Ro05	1274912	G		-1.50452
BBS_INDL77	Rubus occidentalis V3	Ro06	250354	TCCCCTTCTCTCTCTG	-1.11079	-1.77813
BBS_INDL7	Hillquist V1	Ro06	9325750	TAAAAAGAAGGT	-1.32602	-1.25406
BBS_SNP39_1	Hillquist V1	Ro06	14156645	C		-1.22371
BBS_INDL12	Hillquist V1	Ro06	24722421	TTTAG		1.37805
BBS_INDL79	Rubus occidentalis V3	Ro07	23416772	GTTTT		1.77209
